# Supplementary material for: Magnesium Ethylenediamine Borohydride as Solid-State Electrolyte for Magnesium Batteries
Source: PubMed Central journal article supplement (PMC5384009; doi:10.1038/srep46189), 2017-04-07
Supplement: srep46189-s1.pdf [file srep46189-s1.pdf]

# Magnesium Ethylenediamine Borohydride as Solid-State Electrolyte for Magnesium Batteries

Elsa Roedern, Ruben-Simon Kühnel, Arndt Remhof\* and Corsin Battaglia

## Supporting Information

### Table of Content

- Supporting Figures and Tables
  - Figure S1. a) *In situ* PXD of  $\text{Mg}(\text{en})_1(\text{BH}_4)_2$  during heating from 30 to 100 °C. b) Differential scanning calorimetry (DSC) and c) Thermogravimetric analysis (TGA) of  $\text{Mg}(\text{en})_3(\text{BH}_4)_2$  and  $\text{Mg}(\text{en})_1(\text{BH}_4)_2$ .
  - Figure S2. *In situ* PXD of  $\text{Mg}(\text{en})_3(\text{BH}_4)_2 + 2 \text{Mg}(\text{BH}_4)_2$  during heating from 30 to 85 °C.
  - Table S1. Infrared (FTIR) and Raman peaks of  $\text{Mg}(\text{BH}_4)_2$ ,  $\text{Mg}(\text{en})_3(\text{BH}_4)_2$  and  $\text{Mg}(\text{en})_1(\text{BH}_4)_2$
  - Figure S3. SEM image and elemental EDX maps of the Cu electrode after Mg plating in a  $\text{Cu}/\text{Mg}(\text{en})_1(\text{BH}_4)_2/\text{Mg}$  cell at 60 °C.
  - Figure S4. SEM image and elemental EDX maps of Cu electrode in the reference cell  $\text{Cu}/\text{Mg}(\text{en})_1(\text{BH}_4)_2/\text{Mg}$ , kept at 60 °C, but to which no plating current was applied.
- References

## Supporting Figures and Tables

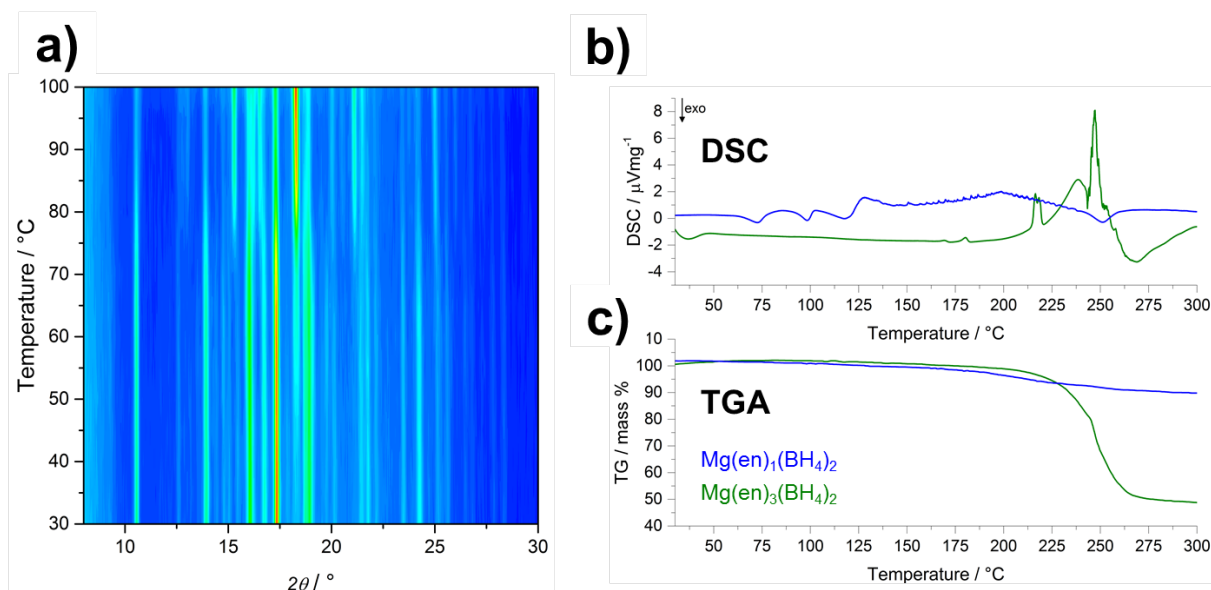

**Figure S1.** a) *In situ* PXD of  $\text{Mg(en)}_1(\text{BH}_4)_2$  during heating from 30 to 100  $^\circ\text{C}$ . b) Differential scanning calorimetry (DSC) and c) Thermogravimetric analysis (TGA) of  $\text{Mg(en)}_3(\text{BH}_4)_2$  and  $\text{Mg(en)}_1(\text{BH}_4)_2$ , 30 - 300  $^\circ\text{C}$ ,  $\Delta T/\Delta t = 5^\circ\text{C}/\text{min}$ , He flow.

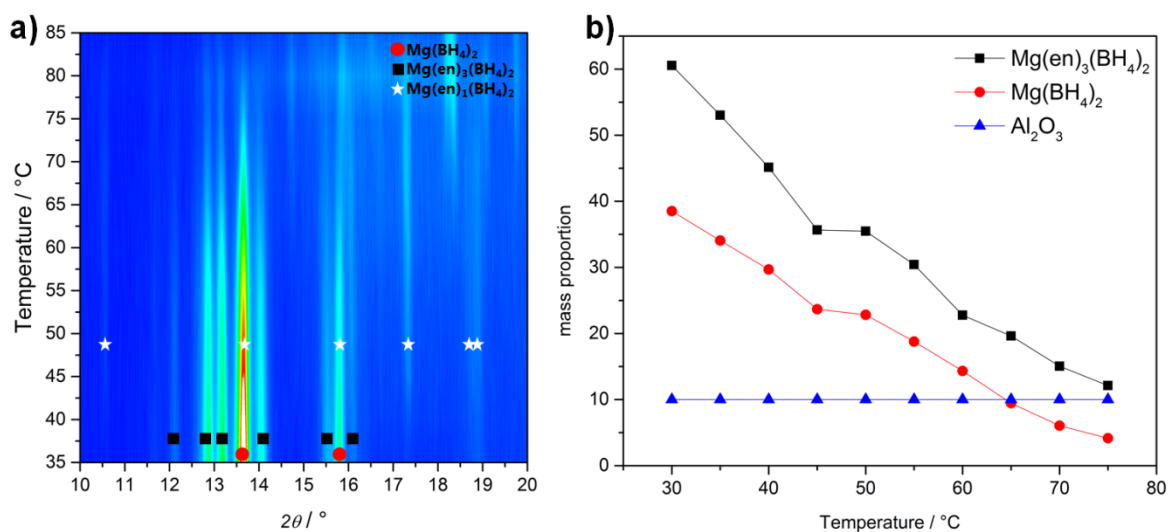

**Figure S2.** a) *In situ* PXD of  $\text{Mg(en)}_3(\text{BH}_4)_2 + 2 \text{Mg}(\text{BH}_4)_2$  during heating from 30 to 85  $^\circ\text{C}$ , b) mass proportion of  $\text{Mg(en)}_3(\text{BH}_4)_2$ ,  $\text{Mg}(\text{BH}_4)_2$  and  $\text{Al}_2\text{O}_3$  (internal standard, normalized to 10 wt%), values obtained by Rietveld refinement.

**Table S1.** Experimentally observed Infrared (FTIR) and Raman peaks of  $\text{Mg}(\text{BH}_4)_2$ ,  $\text{Mg}(\text{en})_3(\text{BH}_4)_2$  and  $\text{Mg}(\text{en})_1(\text{BH}_4)_2$ , approx. description based on literature references<sup>[2-5]</sup>.

| $\text{Mg}(\text{BH}_4)_2$ |           | $\text{Mg}(\text{en})_3(\text{BH}_4)_2$ |          | $\text{Mg}(\text{en})_1(\text{BH}_4)_2$ |          | approx.        |
|----------------------------|-----------|-----------------------------------------|----------|-----------------------------------------|----------|----------------|
| FTIR                       | Raman     | FTIR                                    | Raman    | FTIR                                    | Raman    | Description    |
| ...                        | ...       | ...                                     | ...      | 3332 m                                  | 3320 m,b | N-H stretching |
| ...                        | ...       | ...                                     | ...      | 3319 m                                  | ...      | N-H stretching |
| ...                        | ...       | 3301 s                                  | 3294 m,b | 3303 m                                  | ...      | N-H stretching |
| ...                        | ...       | ...                                     | ...      | 3280 m                                  | 3279 s   | N-H stretching |
| ...                        | ...       | 3251 s                                  | 3250 s   | 3253 s                                  | 3248 s   | N-H stretching |
| ...                        | ...       | 3166 m                                  | 3159 w,b | 3166 m,sh                               | 3160 w,b | N-H stretching |
| ...                        | ...       | 2962 m,sh                               | ...      | 2964 m                                  | ...      | C-H stretching |
| ...                        | ...       | 2937 m                                  | 2940 s,b | 2945 m                                  | 2933 s,b | C-H stretching |
| ...                        | ...       | 2887 m                                  | 2876 s   | 2889 m                                  | 2877 s   | C-H stretching |
| ...                        | ...       | ...                                     | ...      | 2322 s,b                                | 2350 s   | B-H stretching |
| ...                        | 2305 s    | 2300 s/sh                               | ...      | ...                                     | ...      | B-H stretching |
| 2266 S                     | 2267 m,sh | ...                                     | 2256 s   | 2254 s,sh                               | 2256 m,b | B-H stretching |
| ...                        | ...       | 2226 s                                  | ...      | ...                                     | ...      | B-H stretching |
| ...                        | 2193 m    | ...                                     | ...      | 2198 s,b                                | 2204 s   | B-H stretching |
| ...                        | ...       | 2158 s,sh                               | ...      | ...                                     | ...      | B-H stretching |
| ...                        | ...       | 1602 w,sh                               | ...      | ...                                     | ...      | N-H bending    |
| ...                        | ...       | 1573 m                                  | 1574 w,b | 1585 s                                  | 1577 w,b | N-H bending    |
| ...                        | ...       | 1461 m                                  | 1454 m   | 1458 m                                  | 1443 m   | C-H bending    |
| ...                        | 1387 m    | ...                                     | 1378 w,b | ...                                     | 1380 w,b | B-H bending    |
| ...                        | ...       | ...                                     | ...      | 1359 m,b                                | ...      |                |
| ...                        | ...       | ...                                     | ...      | ...                                     | 1340 m,b |                |
| ...                        | ...       | 1332 m                                  | ...      | 1328 m                                  | ...      | NH2 wagging    |
| ...                        | ...       | ...                                     | 1315 w   | ...                                     | 1310 w,b |                |
| ...                        | ...       | ...                                     | ...      | ...                                     | ...      |                |
| ...                        | ...       | 1278 m                                  | 1262 m   | 1280 m                                  | 1265 m   | CH2 gamma      |
| 1259 S                     | ...       | ...                                     | ...      | 1240 w,b                                | ...      | B-H bending    |
| ...                        | ...       | ...                                     | ...      | ...                                     | 1182 m,b |                |
| ...                        | 1171 m,b  | ...                                     | ...      | 1160 w,sh                               | 1162 w,b | B-H bending    |
| 1130 m,b                   | ...       | ...                                     | ...      | 1143 m,sh                               | ...      | B-H bending    |
| ...                        | ...       | ...                                     | ...      | 1120 m, sh                              | ...      |                |
| ...                        | ...       | 1090 b,sh                               | 1084 m,b | 1097 m,b                                | 1084 m   | C-N stretching |
| 1070 w,b                   | ...       | 1080 b,sh                               | ...      | 1070 w, sh                              | ...      | B-H bending    |
| ...                        | ...       | 1004 s                                  | 1012 m,b | 1006 s                                  | 1003 m   | C-C stretching |
| ...                        | ...       | 968 s                                   | 960 w,b  | 960 s                                   | 971 w    | NH2 wagging    |
| ...                        | ...       | 910 m                                   | ...      | ...                                     | 951 w    |                |
| ...                        | ...       | ...                                     | ...      | 908 m                                   | ...      |                |
| ...                        | ...       | ...                                     | 856 s    | ...                                     | 856 s    |                |

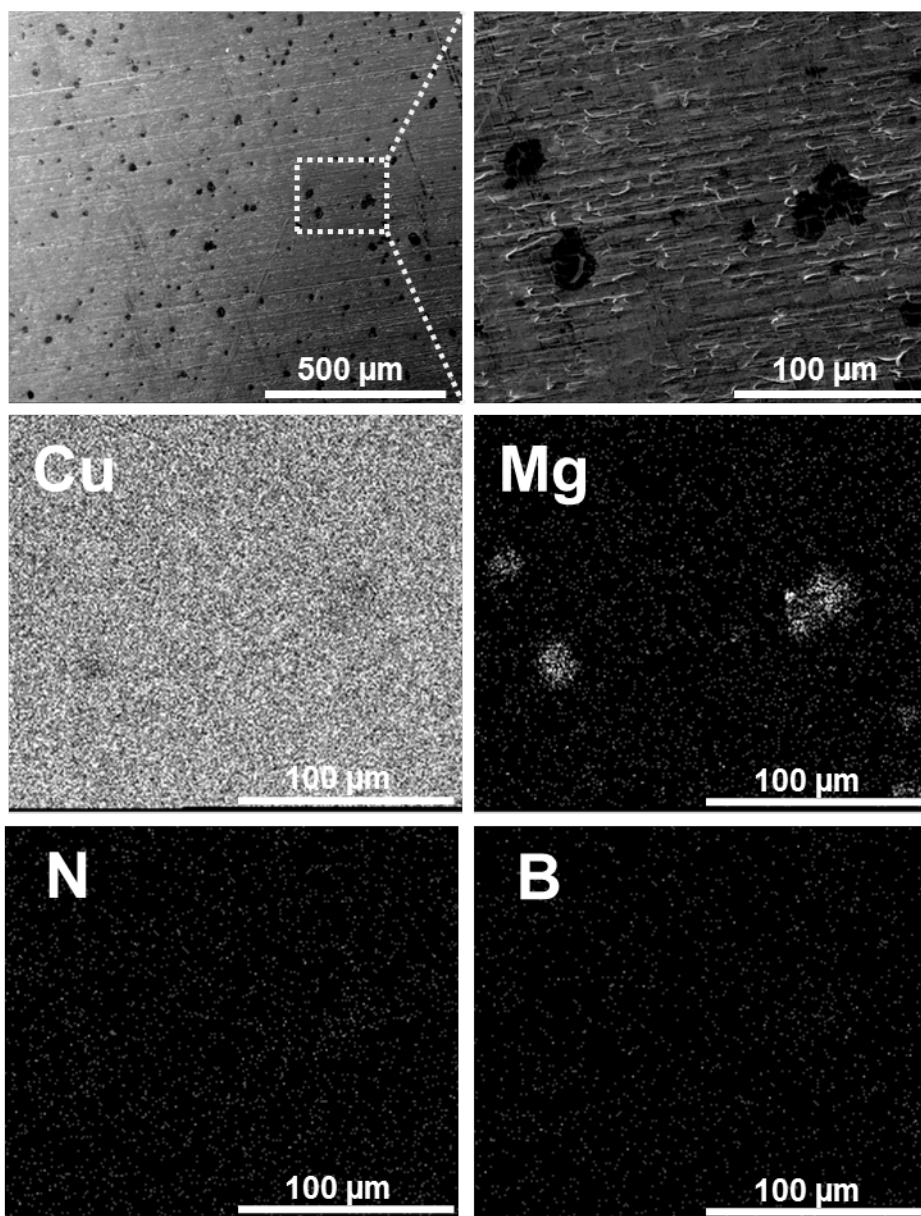

**Figure S3.** SEM image and elemental EDX maps of the Cu electrode after Mg plating in a  $\text{Cu/Mg(en)}_1(\text{BH}_4)_2/\text{Mg}$  cell at 60 °C. The patches are identified by EDX as Mg without N and B.

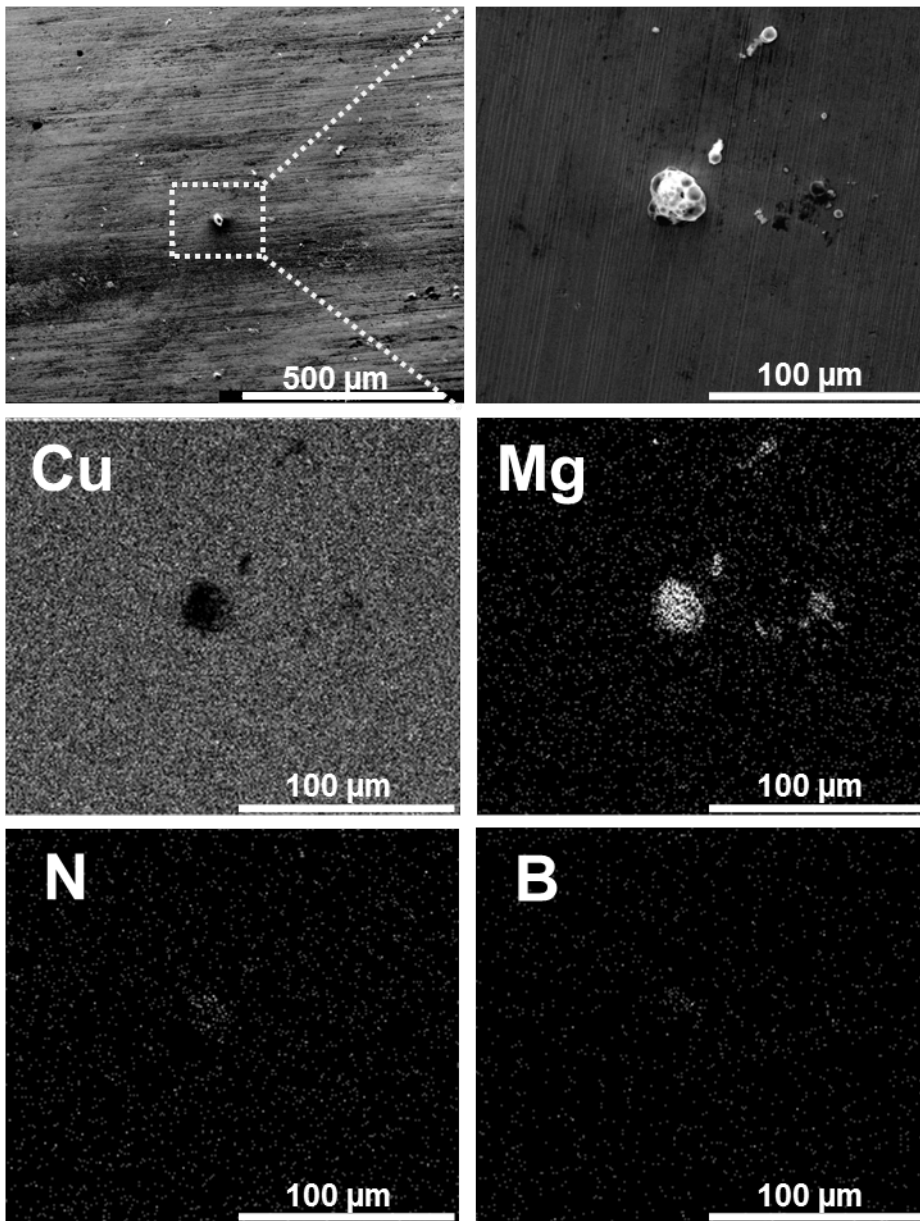

**Figure S4.** SEM image and elemental EDX maps of Cu electrode in the reference cell  $\text{Cu}/\text{Mg}(\text{en})_1(\text{BH}_4)_2/\text{Mg}$ , kept at 60 °C, but to which no plating current was applied. A few particles can be found on the Cu electrode surface, which are identified by EDX as electrolyte particles with Mg, N and B.

## References

- [1] J. Chen, Y. S. Chua, H. Wu, Z. Xiong, T. He, W. Zhou, X. Ju, M. Yang, G. Wu, P. Chen, *Int. J. Hydrogen Energy* **2015**, *40*, 412–419.
- [2] M. G. Giorgini, M. R. Pelletti, G. Paliani, R. S. Cataliotti, *J. Raman Spectrosc.* **1983**, *14*, 16–21.
- [3] T. Iwamoto, D. F. Shriver, *Inorg. Chem.* **1971**, *10*, 2428–2432.
- [4] A. D. Allen, C. V Senoff, *Can. J. Chem.* **1965**, *43*, 888–895.
- [5] A. M. A. Bennett, G. A. Foulds, D. A. Thornton, G. M. Watkins, *Spectrochim. Acta A* **1990**, *46*, 13–22.
